# Supplementary material
Source: PubMed Central journal article supplement (PMC7336520)
Supplement: mic-156-1589-s001.pdf [file mic-156-1589-s001.pdf]

**The antimicrobial compound reuterin (3-hydroxypropionaldehyde) induces oxidative stress via interaction with thiol groups**

**By:** Laura Schaefer, Thomas A. Auchtung, Karley E. Hermans, Daniel Whitehead, Babak Borhan and Robert A. Britton

**Supplementary Table S1. *E. coli* genes induced and repressed upon exposure to reuterin**

See Methods for details of the experiment.

| <b>Gene</b> | <b><i>E. coli</i> MG1655<br/>ORF number</b> | <b>Function</b>                                                                 | <b>Fold increase in<br/>presence of reuterin</b> |
|-------------|---------------------------------------------|---------------------------------------------------------------------------------|--------------------------------------------------|
| <i>bhs</i>  | b1112                                       | ORF, hypothetical protein                                                       | 35.7                                             |
| <i>marA</i> | b1531                                       | Multiple antibiotic resistance; transcriptional activator of defence systems    | 23.3                                             |
| <i>yqhD</i> | b3011                                       | Putative oxidoreductase                                                         | 21.9                                             |
| <i>nemR</i> | b1649                                       | ORF, hypothetical protein                                                       | 20.5                                             |
| <i>marR</i> | b1530                                       | Multiple antibiotic resistance protein; repressor of mar operon                 | 15.5                                             |
| <i>grxA</i> | b0849                                       | Glutaredoxin1 redox coenzyme for glutathione-dependent ribonucleotide reductase | 14.3                                             |
| <i>ybiJ</i> | b0802                                       | ORF, hypothetical protein                                                       | 13.6                                             |
| <i>nemA</i> | b1650                                       | <i>N</i> -Ethylmaleimide reductase                                              | 13.1                                             |
| <i>yqhC</i> | b3010                                       | Putative ARAC-type regulatory protein                                           | 10.3                                             |
| <i>gloA</i> | b1651                                       | Lactoylglutathione lyase                                                        | 8.6                                              |
| <i>ahpF</i> | b0606                                       | Alkyl hydroperoxide reductase, F52a subunit; detoxification of hydroperoxides   | 8.5                                              |
| <i>yhcN</i> | b3238                                       | ORF, hypothetical protein                                                       | 7.4                                              |
| <i>mdaB</i> | b3028                                       | Modulator of drug activity B                                                    | 5.2                                              |
| <i>ahpC</i> | b0605                                       | Alkyl hydroperoxide reductase, C22 subunit; detoxification of hydroperoxides    | 5.0                                              |
| <i>yjbM</i> | b4048                                       | ORF, hypothetical protein                                                       | 4.8                                              |
| <i>yjgI</i> | b4249                                       | Putative oxidoreductase                                                         | 4.6                                              |

| <b>Gene</b> | <b><i>E. coli</i> MG1655<br/>ORF number</b> | <b>Function</b>                                                                       | <b>Fold increase in<br/>presence of reuterin</b> |
|-------------|---------------------------------------------|---------------------------------------------------------------------------------------|--------------------------------------------------|
| <i>emrR</i> | b2684                                       | Regulator of plasmid <i>mcrB</i> operon (microcin B17 synthesis)                      | 4.6                                              |
| <i>katG</i> | b3942                                       | Catalase; hydroperoxidase HPI(I)                                                      | 4.6                                              |
| <i>frmR</i> | b0357                                       | Putative alpha helix chain                                                            | 4.5                                              |
| <i>marB</i> | b1532                                       | Multiple antibiotic resistance protein                                                | 4.5                                              |
| <i>adhC</i> | b0356                                       | Alcohol dehydrogenase class III; formaldehyde dehydrogenase,<br>glutathione-dependent | 4.1                                              |
| <i>cysD</i> | b2752                                       | ATP:sulfurylase (ATP:sulfate adenyltransferase), subunit 2                            | 4.1                                              |
| <i>ibpB</i> | b3686                                       | Heat-shock protein                                                                    | 4.1                                              |
| <i>rnt</i>  | b1652                                       | RNase T, degrades tRNA                                                                | 4.0                                              |
| <i>nfnB</i> | b0578                                       | Oxygen-insensitive NAD(P)H nitroreductase                                             | 3.9                                              |
| <i>dkgA</i> | b3012                                       | 2,5-Diketo-D-gluconate reductase A                                                    | 3.9                                              |
| <i>yafB</i> | b0207                                       | Putative aldose reductase (EC 1.1.1.21)                                               | 3.8                                              |
| <i>yegQ</i> | b2081                                       | ORF, hypothetical protein                                                             | 3.6                                              |
| <i>iscR</i> | b2531                                       | Transcriptional repressor for <i>isc</i> operon                                       | 3.6                                              |
| <i>trxC</i> | b2582                                       | Putative thioredoxin-like protein                                                     | 3.5                                              |
| <i>iscS</i> | b2530                                       | Putative aminotransferase                                                             | 3.4                                              |
| <i>adiY</i> | b4116                                       | Putative ARAC-type regulatory protein                                                 | 3.3                                              |
| <i>ibpA</i> | b3687                                       | Heat-shock protein                                                                    | 3.3                                              |
| <i>nrdH</i> | b2673                                       | Glutaredoxin-like protein; hydrogen donor                                             | 3.3                                              |
| <i>rsmE</i> | b2946                                       | ORF, hypothetical protein                                                             | 3.2                                              |
| <i>ybdG</i> | b0577                                       | Putative transporter                                                                  | 3.2                                              |
| <i>inaA</i> | b2237                                       | pH-inducible protein involved in stress response                                      | 3.1                                              |
| <i>yeiR</i> | b2173                                       | ORF, hypothetical protein                                                             | 2.9                                              |
| <i>gshB</i> | b2947                                       | Glutathione synthetase                                                                | 2.9                                              |
| <i>lpxT</i> | b2174                                       | ORF, hypothetical protein                                                             | 2.9                                              |
| <i>yfhE</i> | b2527                                       | ORF, hypothetical protein                                                             | 2.9                                              |

| <b>Gene</b> | <b><i>E. coli</i> MG1655<br/>ORF number</b> | <b>Function</b>                                               | <b>Fold increase in<br/>presence of reuterin</b> |
|-------------|---------------------------------------------|---------------------------------------------------------------|--------------------------------------------------|
| <i>astD</i> | b1746                                       | Putative aldehyde dehydrogenase                               | 2.8                                              |
| <i>iscA</i> | b2528                                       | Iron–sulfur cluster assembly protein                          | 2.8                                              |
| <i>ribE</i> | b1662                                       | Riboflavin synthase, alpha chain                              | 2.8                                              |
| <i>sodA</i> | b3908                                       | Superoxide dismutase, manganese                               | 2.8                                              |
| <i>iscU</i> | b2529                                       | Iron–sulfur cluster assembly scaffold protein                 | 2.8                                              |
| <i>htrB</i> | b1054                                       | Heat-shock protein                                            | 2.8                                              |
| <i>hemB</i> | b0369                                       | 5-aminolevulinate dehydratase = porphobilinogen synthase      | 2.7                                              |
| <i>yhbW</i> | b3160                                       | Putative enzyme                                               | 2.7                                              |
| <i>rzpQ</i> | b1553                                       | ORF, hypothetical protein                                     | 2.7                                              |
| <i>cysH</i> | b2762                                       | 3'-phosphoadenosine 5'-phosphosulfate reductase               | 2.7                                              |
| <i>cysJ</i> | b2764                                       | Sulfite reductase (NADPH), flavoprotein beta subunit          | 2.7                                              |
| <i>ytfI</i> | b4215                                       | ORF, hypothetical protein                                     | 2.6                                              |
| <i>iscX</i> | b2524                                       | Iron–sulfur cluster assembly protein                          | 2.6                                              |
| <i>yjgH</i> | b4248                                       | ORF, hypothetical protein                                     | 2.6                                              |
| <i>fdx</i>  | b2525                                       | [2FE–2S] ferredoxin, electron carrier protein                 | 2.6                                              |
| <i>fur</i>  | b0683                                       | Negative regulator                                            | 2.6                                              |
| <i>ytfG</i> | b4211                                       | Putative oxidoreductase                                       | 2.6                                              |
| <i>cysI</i> | b2763                                       | Sulfite reductase, alpha subunit                              | 2.6                                              |
| <i>ribA</i> | b1277                                       | GTP cyclohydrolase II                                         | 2.5                                              |
| <i>ycaM</i> | b0899                                       | Putative transport                                            | 2.5                                              |
| <i>hemF</i> | b2436                                       | Coproporphyrinogen III oxidase                                | 2.4                                              |
| <i>amiA</i> | b2435                                       | <i>N</i> -acetylmuramoyl-L-alanine amidase I                  | 2.4                                              |
| <i>yciW</i> | b1287                                       | Putative oxidoreductase                                       | 2.4                                              |
| <i>hscA</i> | b2526                                       | Heat-shock protein, chaperone, member of Hsp70 protein family | 2.3                                              |
| <i>yffQ</i> | b2448                                       | ORF, hypothetical protein                                     | 2.3                                              |
| <i>poxB</i> | b0871                                       | Pyruvate oxidase                                              | 2.3                                              |

| <b>Gene</b> | <b><i>E. coli</i> MG1655<br/>ORF number</b> | <b>Function</b>                                                             | <b>Fold increase in<br/>presence of reuterin</b> |
|-------------|---------------------------------------------|-----------------------------------------------------------------------------|--------------------------------------------------|
| <i>ybcC</i> | b0920                                       | ORF, hypothetical protein                                                   | 2.3                                              |
| <i>yadR</i> | b0156                                       | ORF, hypothetical protein                                                   | 2.3                                              |
| <i>ygfZ</i> | b2898                                       | ORF, hypothetical protein                                                   | 2.3                                              |
| <i>yaiM</i> | b0355                                       | Putative esterase (EC 3.1.1.1)                                              | 2.3                                              |
| <i>nrdA</i> | b2234                                       | Ribonucleoside diphosphate reductase 1, alpha subunit, B1                   | 2.3                                              |
| <i>yhgI</i> | b3414                                       | ORF, hypothetical protein                                                   | 2.3                                              |
| <i>yncJ</i> | b1436                                       | ORF, hypothetical protein                                                   | 2.2                                              |
| <i>xthA</i> | b1749                                       | Exonuclease III                                                             | 2.2                                              |
| <i>cysA</i> | b2422                                       | ATP-binding component of sulfate permease A protein;<br>chromate resistance | 2.2                                              |
| <i>yeeD</i> | b2012                                       | ORF, hypothetical protein                                                   | 2.1                                              |
| <i>emrA</i> | b2685                                       | Multidrug resistance secretion protein                                      | 2.1                                              |
| <i>yqfE</i> | b2915                                       | ORF, hypothetical protein                                                   | 2.1                                              |
| <i>cydB</i> | b0734                                       | Cytochrome <i>d</i> terminal oxidase polypeptide subunit II                 | 2.1                                              |
| <i>ybdJ</i> | b0580                                       | ORF, hypothetical protein                                                   | 2.1                                              |
| <i>folE</i> | b2153                                       | GTP cyclohydrolase I                                                        | 2.1                                              |
| <i>yljA</i> | b0881                                       | ORF, hypothetical protein                                                   | 2.1                                              |
| <i>ybhT</i> | b0762                                       | ORF, hypothetical protein                                                   | 2.1                                              |
| <i>fruB</i> | b2169                                       | PTS system, fructose-specific IIA/fpr component                             | 2.1                                              |
| <i>mdaA</i> | b0851                                       | Modulator of drug activity A                                                | 2.1                                              |
| <i>yggR</i> | b2950                                       | Putative protein transport                                                  | 2.1                                              |
| <i>add</i>  | b1623                                       | Adenosine deaminase                                                         | 2.1                                              |
| <i>cysK</i> | b2414                                       | Cysteine synthase A, O-acetylserine sulfhydrylase A                         | 2.1                                              |
| <i>def</i>  | b3287                                       | Peptide deformylase                                                         | 2.1                                              |
| <i>pepE</i> | b4021                                       | Peptidase E, a dipeptidase where amino-terminal residue is<br>aspartate     | 2.1                                              |

| <b>Gene</b> | <b><i>E. coli</i> MG1655<br/>ORF number</b> | <b>Function</b>                                   | <b>Fold increase in<br/>presence of reuterin</b> |
|-------------|---------------------------------------------|---------------------------------------------------|--------------------------------------------------|
| <i>ycaK</i> | b0901                                       | ORF, hypothetical protein                         | 2.1                                              |
| <i>fryB</i> | b2387                                       | Putative PTS system enzyme IIB component          | 2.1                                              |
| <i>soxS</i> | b4062                                       | Regulation of superoxide response regulon         | 2.1                                              |
| <i>cysP</i> | b2425                                       | Thiosulfate binding protein                       | 2.0                                              |
| <i>ompX</i> | b0814                                       | Outer-membrane protein X                          | 2.0                                              |
| <i>adiA</i> | b4117                                       | Biodegradative arginine decarboxylase             | 2.0                                              |
| <i>zwf</i>  | b1852                                       | Glucose-6-phosphate dehydrogenase                 | 2.0                                              |
| <i>ydjN</i> | b1729                                       | Part of a kinase                                  | 2.0                                              |
| <i>mioC</i> | b3742                                       | Initiation of chromosome replication              | 2.0                                              |
| <i>idi</i>  | b2889                                       | Putative enzyme                                   | 2.0                                              |
| <i>ymfD</i> | b1137                                       | ORF, hypothetical protein                         | 2.0                                              |
| <i>arrQ</i> | b1554                                       | Putative lysozyme                                 | 1.9                                              |
| <i>hemH</i> | b0475                                       | Ferrochelatase: final enzyme of haem biosynthesis | 1.9                                              |
| <i>arsC</i> | b3503                                       | Arsenate reductase                                | 1.9                                              |
| <i>yceE</i> | b1053                                       | ORF, hypothetical protein                         | 1.9                                              |
| <i>aceA</i> | b4015                                       | Isocitrate lyase                                  | 1.9                                              |
| <i>ycgC</i> | b1198                                       | Putative PTS system enzyme I                      | 1.9                                              |
| <i>clpA</i> | b0882                                       | ATP-binding component of serine protease          | 1.9                                              |
| <i>ycjY</i> | b1327                                       | ORF, hypothetical protein                         | 1.9                                              |
| <i>cstC</i> | b1748                                       | Acetylornithine delta-aminotransferase            | 1.9                                              |
| <i>cadA</i> | b4131                                       | Lysine decarboxylase 1                            | 1.9                                              |
| <i>hyaA</i> | b0972                                       | Hydrogenase-1 small subunit                       | -11.6                                            |
| <i>hyaB</i> | b0973                                       | Hydrogenase-1 large subunit                       | -9.7                                             |
| <i>gadA</i> | b3517                                       | Glutamate decarboxylase isozyme                   | -8.5                                             |
| <i>tdcB</i> | b3117                                       | Threonine dehydratase, catabolic                  | -8.2                                             |
| <i>gadB</i> | b1493                                       | Glutamate decarboxylase isozyme                   | -7.3                                             |

| <b>Gene</b> | <b><i>E. coli</i> MG1655<br/>ORF number</b> | <b>Function</b>                                                     | <b>Fold increase in<br/>presence of reuterin</b> |
|-------------|---------------------------------------------|---------------------------------------------------------------------|--------------------------------------------------|
| <i>tdcE</i> | b3114                                       | Probable formate acetyltransferase 3                                | -7.1                                             |
| <i>hyaD</i> | b0975                                       | Processing of HyaA and HyaB proteins                                | -6.9                                             |
| <i>yhiM</i> | b3491                                       | ORF, hypothetical protein                                           | -6.6                                             |
| <i>frvR</i> | b3897                                       | Putative DNA transposition protein                                  | -6.2                                             |
| <i>cnu</i>  | b1625                                       | ORF, hypothetical protein                                           | -5.8                                             |
| <i>yciD</i> | b1256                                       | Putative outer-membrane protein                                     | -5.4                                             |
| <i>tnaA</i> | b3708                                       | Tryptophanase                                                       | -5.3                                             |
| <i>xasA</i> | b1492                                       | Acid sensitivity protein, putative transporter                      | -5.1                                             |
| <i>ompC</i> | b2215                                       | Outer-membrane protein 1b (Ib;c)                                    | -4.7                                             |
| <i>yehZ</i> | b2131                                       | Putative transport system permease protein                          | -4.6                                             |
| <i>yjiH</i> | b4330                                       | ORF, hypothetical protein                                           | -4.5                                             |
| <i>yhiE</i> | b3512                                       | ORF, hypothetical protein                                           | -4.3                                             |
| <i>hyaC</i> | b0974                                       | Probable Ni/Fe-hydrogenase 1 <i>b</i> -type cytochrome subunit      | -4.2                                             |
| <i>glpC</i> | b2243                                       | sn-glycerol-3-phosphate dehydrogenase (anaerobic), K-small subunit  | -4.2                                             |
| <i>hyaE</i> | b0976                                       | Processing of HyaA and HyaB proteins                                | -4.2                                             |
| <i>pheA</i> | b2599                                       | Chorismate mutase-P and prephenate dehydratase                      | -4.1                                             |
| <i>hns</i>  | b1237                                       | DNA-binding protein HLP-II (HU, BH2, HD, NS); pleiotropic regulator | -4.0                                             |
| <i>hdeA</i> | b3510                                       | ORF, hypothetical protein                                           | -4.0                                             |
| <i>yeaU</i> | b1800                                       | Putative tartrate dehydrogenase                                     | -3.9                                             |
| <i>tnaL</i> | b3707                                       | Tryptophanase leader peptide                                        | -3.9                                             |
| <i>ansB</i> | b2957                                       | Periplasmic L-asparaginase II                                       | -3.8                                             |
| <i>glpA</i> | b2241                                       | sn-glycerol-3-phosphate dehydrogenase (anaerobic), large subunit    | -3.7                                             |
| <i>yibP</i> | b3613                                       | Putative membrane protein                                           | -3.7                                             |
| <i>tdcC</i> | b3116                                       | Anaerobically inducible L-threonine, L-serine permease              | -3.6                                             |

| <b>Gene</b> | <b><i>E. coli</i> MG1655<br/>ORF number</b> | <b>Function</b>                                                                     | <b>Fold increase in<br/>presence of reuterin</b> |
|-------------|---------------------------------------------|-------------------------------------------------------------------------------------|--------------------------------------------------|
| <i>ydfZ</i> | b1541                                       | ORF, hypothetical protein                                                           | -3.5                                             |
| <i>hdeB</i> | b3509                                       | ORF, hypothetical protein                                                           | -3.5                                             |
| <i>tdcD</i> | b3115                                       | Putative kinase                                                                     | -3.4                                             |
| <i>yobF</i> | b1824                                       | ORF, hypothetical protein                                                           | -3.4                                             |
| <i>argT</i> | b2310                                       | lysine-, arginine-, ornithine-binding periplasmic protein                           | -3.4                                             |
| <i>ybaS</i> | b0485                                       | Putative glutaminase                                                                | -3.4                                             |
| <i>appA</i> | b0980                                       | Phosphoanhydride phosphorylase; pH 2.5 acid phosphatase;<br>periplasmic             | -3.3                                             |
| <i>hycA</i> | b2725                                       | Transcriptional repression of <i>hyc</i> and <i>hyp</i> operons                     | -3.2                                             |
| <i>fumB</i> | b4122                                       | Phage transposase                                                                   | -3.2                                             |
| <i>slp</i>  | b3506                                       | Outer-membrane protein induced after carbon starvation                              | -3.1                                             |
| <i>ybjZ</i> | b0879                                       | Putative ATP-binding component of a transport system                                | -3.1                                             |
| <i>glpB</i> | b2242                                       | sn-glycerol-3-phosphate dehydrogenase (anaerobic), membrane<br>anchor subunit       | -3.1                                             |
| <i>hydN</i> | b2713                                       | Involved in electron transport from formate to hydrogen, Fe-S<br>centres            | -3.1                                             |
| <i>lldD</i> | b3605                                       | L-lactate dehydrogenase                                                             | -3.0                                             |
| <i>hycH</i> | b2718                                       | Processing of large subunit (HycE) of hydrogenase 3 (part of the<br>FHL complex)    | -3.0                                             |
| <i>stfR</i> | b1372                                       | Unknown protein encoded by prophage CP-933X                                         | -3.0                                             |
| <i>cbpA</i> | b1000                                       | Curved DNA-binding protein; functions closely related to DnaJ                       | -3.0                                             |
| <i>evgA</i> | b2369                                       | Putative positive transcription regulator (sensor EvgS)                             | -3.0                                             |
| <i>yehL</i> | b2119                                       | ORF, hypothetical protein                                                           | -2.9                                             |
| <i>hyaF</i> | b0977                                       | Nickel incorporation into hydrogenase-1 proteins                                    | -2.9                                             |
| <i>hdeD</i> | b3511                                       | ORF, hypothetical protein                                                           | -2.9                                             |
| <i>wrbA</i> | b1004                                       | trp repressor binding protein; affects association of trp repressor<br>and operator | -2.9                                             |

| <b>Gene</b> | <b><i>E. coli</i> MG1655<br/>ORF number</b> | <b>Function</b>                                                                                            | <b>Fold increase in<br/>presence of reuterin</b> |
|-------------|---------------------------------------------|------------------------------------------------------------------------------------------------------------|--------------------------------------------------|
| <i>hypA</i> | b2726                                       | Pleiotropic effects on three hydrogenase isozymes                                                          | -2.9                                             |
| <i>hemD</i> | b3804                                       | Uroporphyrinogen III synthase                                                                              | -2.9                                             |
| <i>hycF</i> | b2720                                       | Probable iron-sulfur protein of hydrogenase 3 (part of FHL complex)                                        | -2.8                                             |
| <i>yheN</i> | b3345                                       | Putative citrate permease                                                                                  | -2.8                                             |
| <i>ybaT</i> | b0486                                       | Putative amino acid/amine transport protein                                                                | -2.8                                             |
| <i>viaZ</i> | b3556a                                      | Putative membrane-permeability-altering protein                                                            | -2.8                                             |
| <i>None</i> | b4103                                       | Membrane channel protein component of Pn transporter                                                       | -2.8                                             |
| <i>yfiQ</i> | b2584                                       | ORF, hypothetical protein                                                                                  | -2.8                                             |
| <i>tnaB</i> | b3709                                       | Low-affinity tryptophan permease                                                                           | -2.8                                             |
| <i>appC</i> | b0978                                       | Probable third cytochrome oxidase, subunit I                                                               | -2.7                                             |
| <i>yjcC</i> | b4061                                       | Hypothetical protein                                                                                       | -2.7                                             |
| <i>malP</i> | b3417                                       | Maltodextrin phosphorylase                                                                                 | -2.7                                             |
| <i>yjiG</i> | b4329                                       | ORF, hypothetical protein                                                                                  | -2.6                                             |
| <i>yhaP</i> | b3111                                       | Putative L-serine dehydratase                                                                              | -2.6                                             |
| <i>treB</i> | b4240                                       | PTS system enzyme II, trehalose-specific                                                                   | -2.6                                             |
| <i>treC</i> | b4239                                       | Trehalase 6-P hydrolase                                                                                    | -2.6                                             |
| <i>frdA</i> | b4154                                       | Fumarate reductase, anaerobic, flavoprotein subunit                                                        | -2.6                                             |
| <i>hycE</i> | b2721                                       | Large subunit of hydrogenase 3 [part of formate hydrogenlyase (FHL) complex]                               | -2.6                                             |
| <i>hycD</i> | b2722                                       | Membrane-spanning protein of hydrogenase 3 [part of formate hydrogenlyase (FHL) complex]                   | -2.6                                             |
| <i>hycB</i> | b2724                                       | Probable small subunit of hydrogenase-3, iron-sulfur protein [part of formate hydrogenlyase (FHL) complex] | -2.5                                             |
| <i>glpT</i> | b2240                                       | sn-glycerol-3-phosphate permease                                                                           | -2.5                                             |
| <i>ynaF</i> | b1376                                       | Putative filament protein                                                                                  | -2.5                                             |
| <i>hisG</i> | b2019                                       | ATP phosphoribosyltransferase                                                                              | -2.5                                             |



| <b>Gene</b> | <b><i>E. coli</i> MG1655<br/>ORF number</b> | <b>Function</b>                                                      | <b>Fold increase in<br/>presence of reuterin</b> |
|-------------|---------------------------------------------|----------------------------------------------------------------------|--------------------------------------------------|
| <i>ynfK</i> | b1593                                       | ORF, hypothetical protein                                            | -2.5                                             |
| <i>yehH</i> | b1205                                       | ORF, hypothetical protein                                            | -2.5                                             |
| <i>yhaQ</i> | b3112                                       | Putative L-serine dehydratase                                        | -2.4                                             |
| <i>yhiU</i> | b3513                                       | Putative membrane protein                                            | -2.4                                             |
| <i>glpF</i> | b3927                                       | Facilitated diffusion of glycerol                                    | -2.4                                             |
| <i>None</i> | b3808                                       | ORF, hypothetical protein                                            | -2.4                                             |
| <i>pheL</i> | b2598                                       | Leader peptide of chorismate mutase-P-prephenate dehydratase         | -2.3                                             |
| <i>hycG</i> | b2719                                       | Hydrogenase activity                                                 | -2.3                                             |
| <i>narG</i> | b1224                                       | Nitrate reductase 1, alpha subunit                                   | -2.3                                             |
| <i>ydfD</i> | b1576                                       | ORF, hypothetical protein                                            | -2.2                                             |
| <i>rob</i>  | b4396                                       | Right origin-binding protein                                         | -2.2                                             |
| <i>dpdA</i> | b2146                                       | Putative oxidoreductase                                              | -2.2                                             |
| <i>aidB</i> | b4187                                       | Putative acyl coenzyme A dehydrogenase                               | -2.2                                             |
| <i>glpQ</i> | b2239                                       | Glycerophosphodiester phosphodiesterase, periplasmic                 | -2.2                                             |
| <i>fimB</i> | b4312                                       | Recombinase involved in phase variation; regulator for fimA          | -2.2                                             |
| <i>yhiV</i> | b3514                                       | Putative transport system permease protein                           | -2.2                                             |
| <i>glpX</i> | b3925                                       | Unknown protein encoded by prophage CP-933N                          | -2.2                                             |
| <i>pckA</i> | b3403                                       | Phosphoenolpyruvate carboxykinase                                    | -2.2                                             |
| <i>pspF</i> | b1303                                       | Psp operon transcriptional activator                                 | -2.2                                             |
| <i>yffQ</i> | b2633                                       | ORF, hypothetical protein                                            | -2.1                                             |
| <i>dnaK</i> | b0014                                       | Chaperone Hsp70; DNA biosynthesis; autoregulated heat-shock proteins | -2.1                                             |
| <i>mviN</i> | b1069                                       | Putative virulence factor                                            | -2.1                                             |
|             | b1586                                       | ORF, hypothetical protein                                            | -2.1                                             |
| <i>dpdB</i> | b2147                                       | Putative oxidoreductase                                              | -2.1                                             |
| <i>rbsB</i> | b3751                                       | D-ribose periplasmic binding protein                                 | -2.1                                             |

| <b>Gene</b> | <b><i>E. coli</i> MG1655<br/>ORF number</b> | <b>Function</b>                                                                                  | <b>Fold increase in<br/>presence of reuterin</b> |
|-------------|---------------------------------------------|--------------------------------------------------------------------------------------------------|--------------------------------------------------|
| <i>hypB</i> | b2727                                       | Guanine-nucleotide binding protein, functions as nickel donor for large subunit of hydrogenase 3 | -2.1                                             |
| <i>lamB</i> | b4036                                       | Phage lambda receptor protein; maltose high-affinity receptor                                    | -2.1                                             |
| <i>yjiE</i> | b4327                                       | Putative transcriptional regulator LYSR-type                                                     | -2.1                                             |
| <i>yecI</i> | b1902                                       | Ferritin-like protein                                                                            | -2.1                                             |
| <i>yjeF</i> | b4167                                       | ORF; Unknown function                                                                            | -2.1                                             |
| <i>bssR</i> | b0836                                       | Putative receptor                                                                                | -2.1                                             |
| <i>hypC</i> | b2728                                       | Pleiotrophic effects on three hydrogenase isozymes                                               | -2.1                                             |
| <i>hdhA</i> | b1619                                       | NAD-dependent 7alpha-hydroxysteroid dehydrogenase, dehydroxylation of bile acids                 | -2.1                                             |
| <i>hypD</i> | b2729                                       | Pleiotrophic effects on three hydrogenase isozymes                                               | -2.1                                             |
| <i>ychM</i> | b1206                                       | ORF, hypothetical protein                                                                        | -2.1                                             |
| <i>yhiF</i> | b3507                                       | ORF, hypothetical protein                                                                        | -2.1                                             |
